# Supplementary material
Source: Royal Society of Chemistry journal article supplement (doi:10.1039/d6ta00667a)
Supplement: d6ta00667a1.pdf [file d6ta00667a1.pdf]

## Supporting Information

### Engineering High-Energy, High-Rate NASICON Cathodes via Cu Doping and Microwave-Induced Grain Refinement for Sodium-Ion Batteries

Zhao XIE<sup>†</sup>, Jun WU<sup>†</sup>, Yali SUN, Qiumei WAN, Wenwen CUI, Qingqing GE, Dai LU, Chunyang LI\*,  
Hong LUO\*

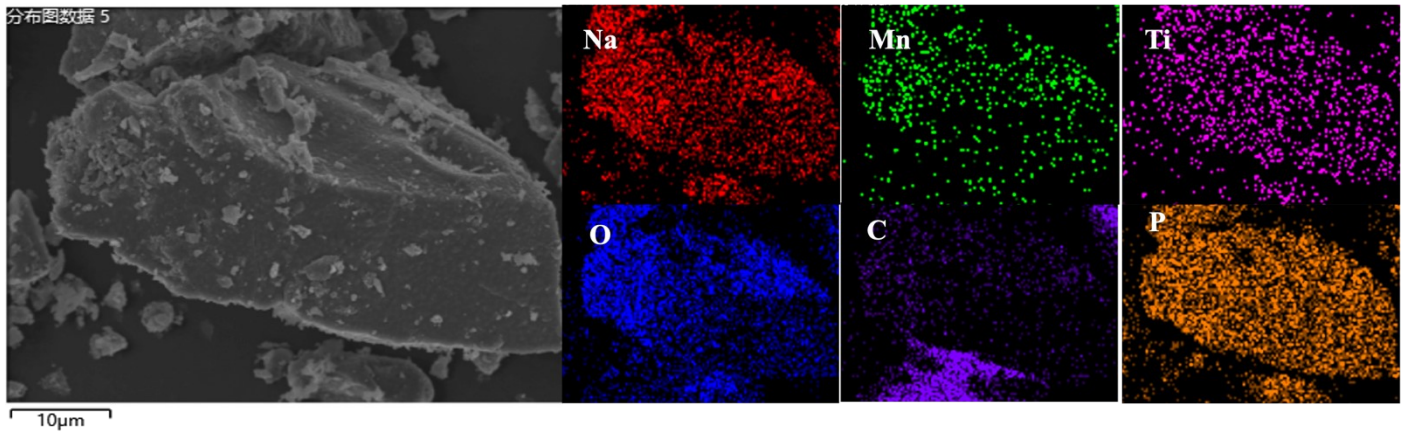

Figure S1. EDS mapping images and SEM images of NMTP treated by microwave heating way

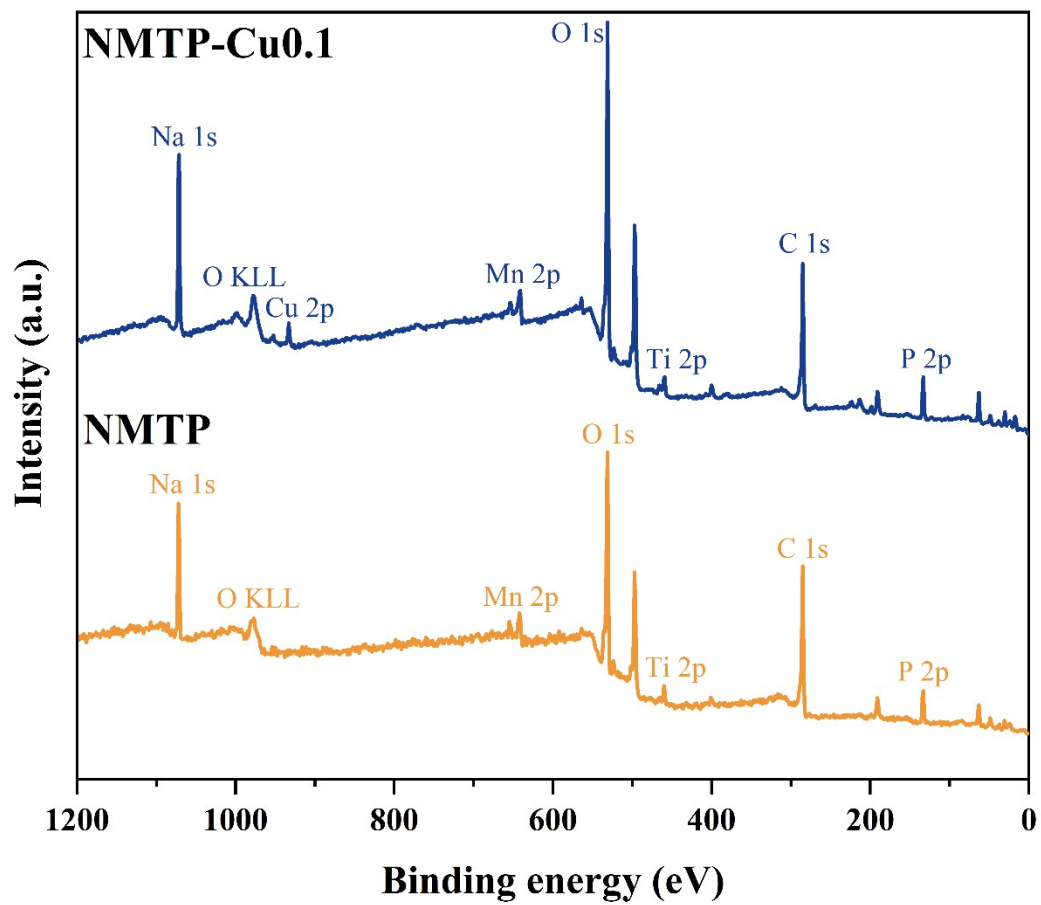

Figure S2. The XPS survey spectra of the NMTP and NMTP-Cu<sub>0.1</sub>.

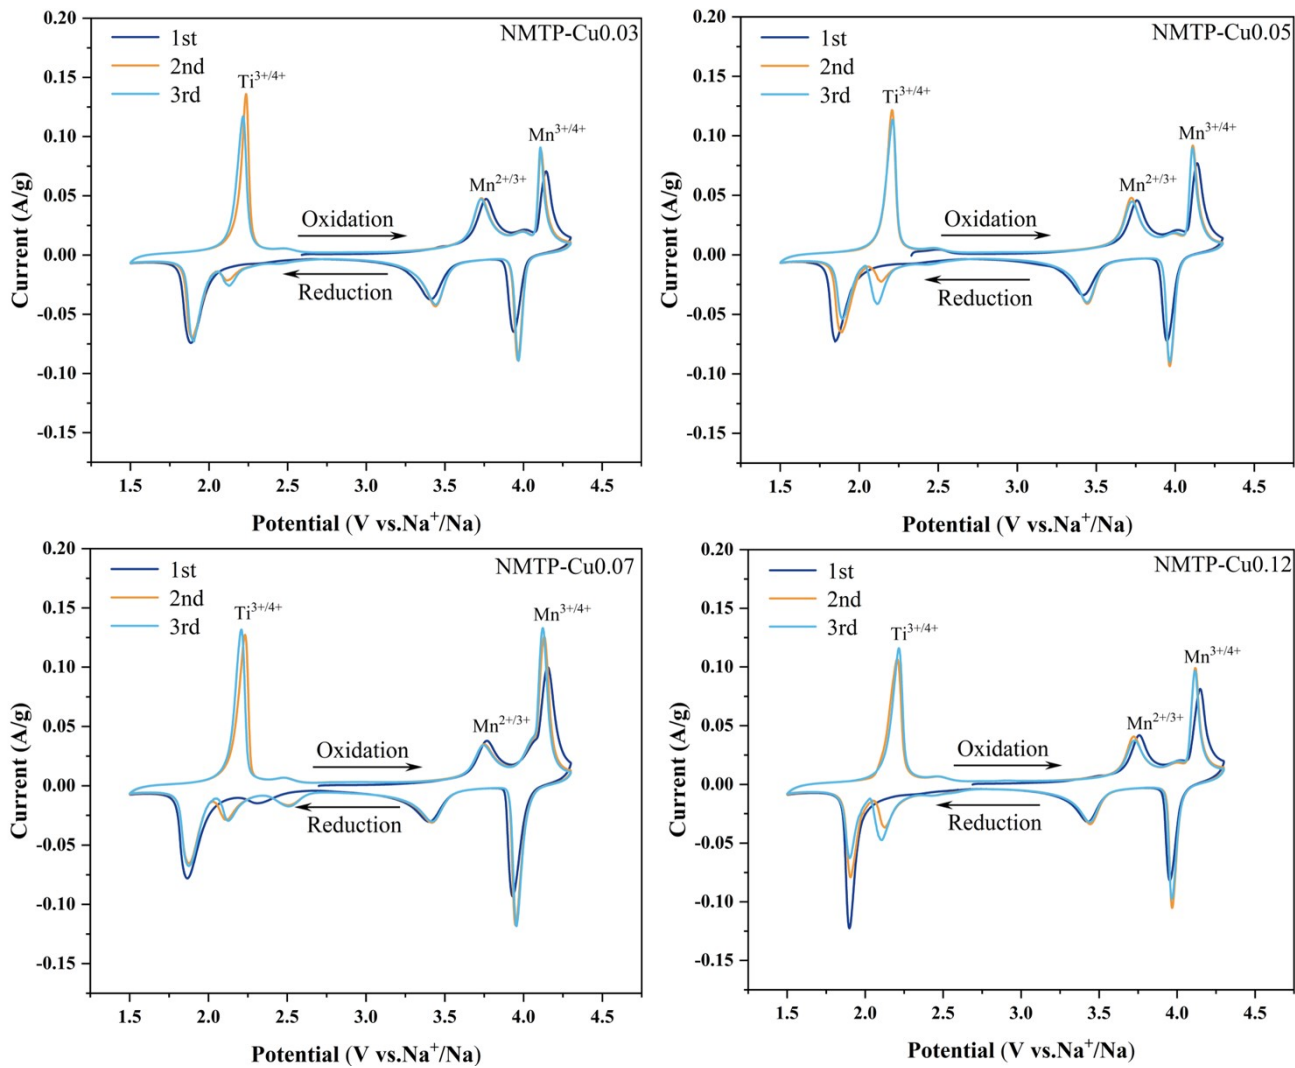

**Figure S3.** CV curves of NMTP-Cu<sub>x</sub> (x=0.03, 0.05, 0.07, 0.12) series.

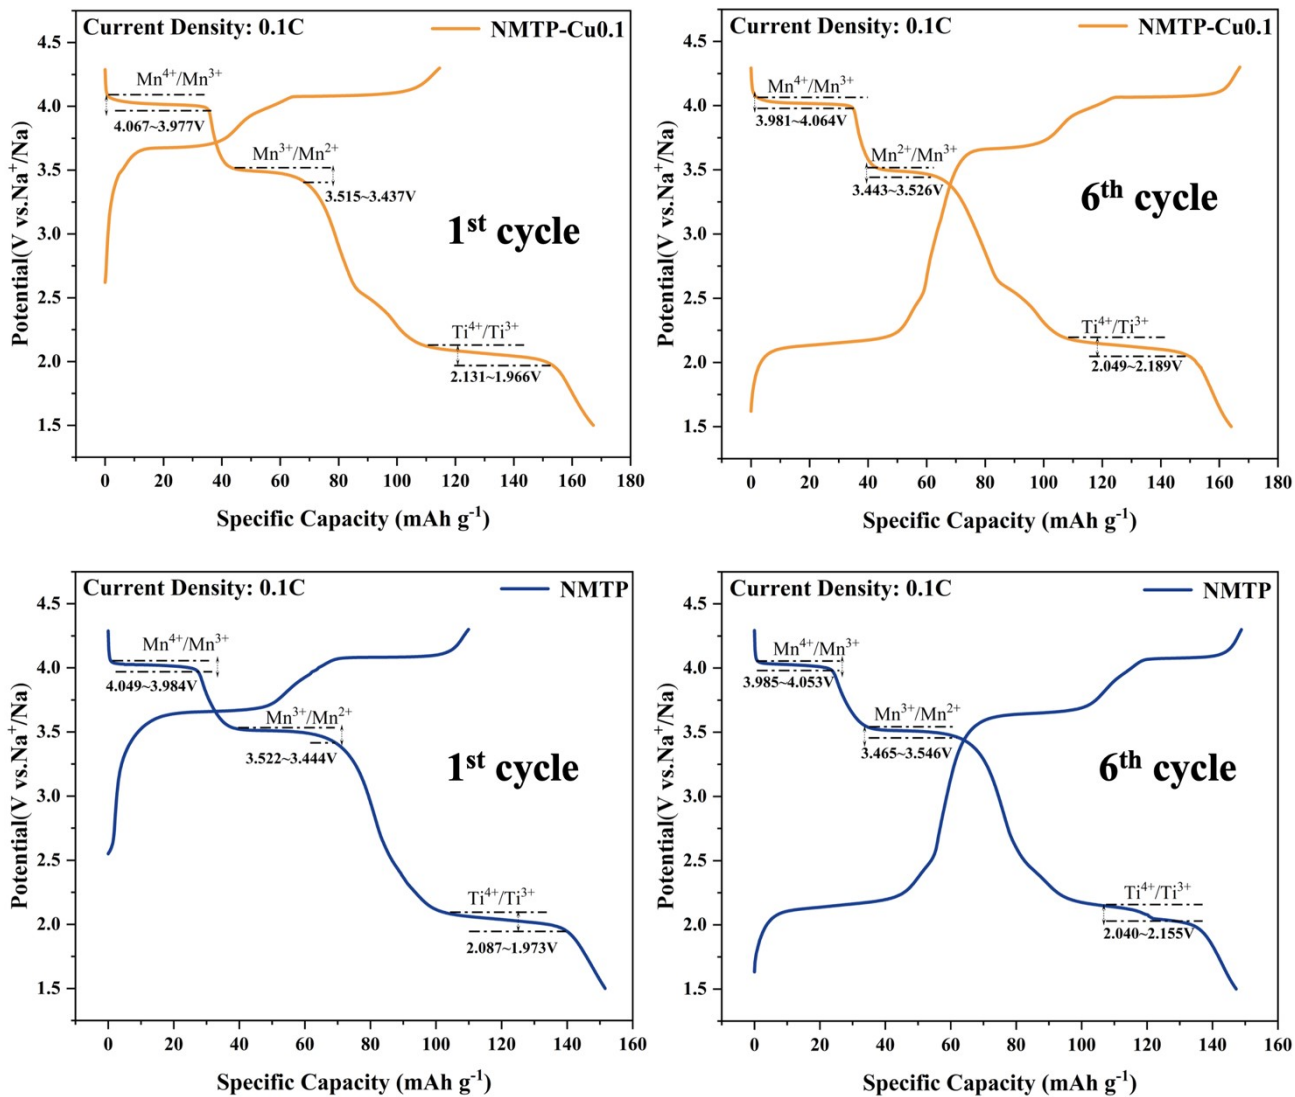

Figure S4. GCD profiles of NMTP-Cu<sub>0.1</sub> and NMTP at first cycle and sixth cycle.

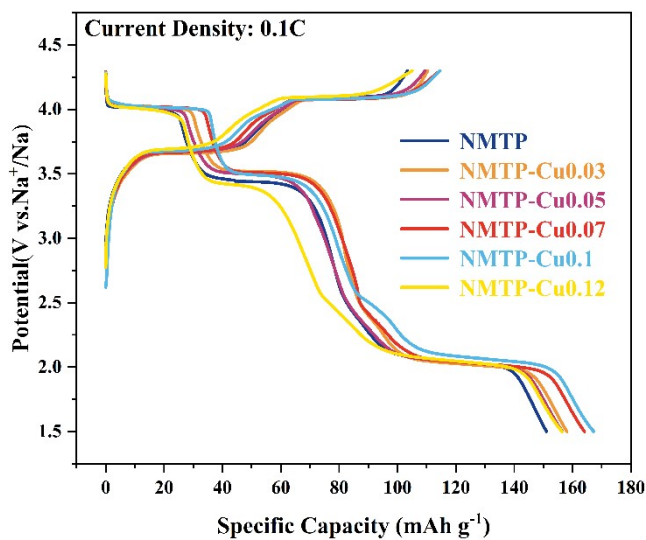

Figure S5. GCD curves and of NMTP-Cu<sub>x</sub> (x=0, 0.03, 0.05, 0.07, 0.1, 0.12) series at 0.1C.

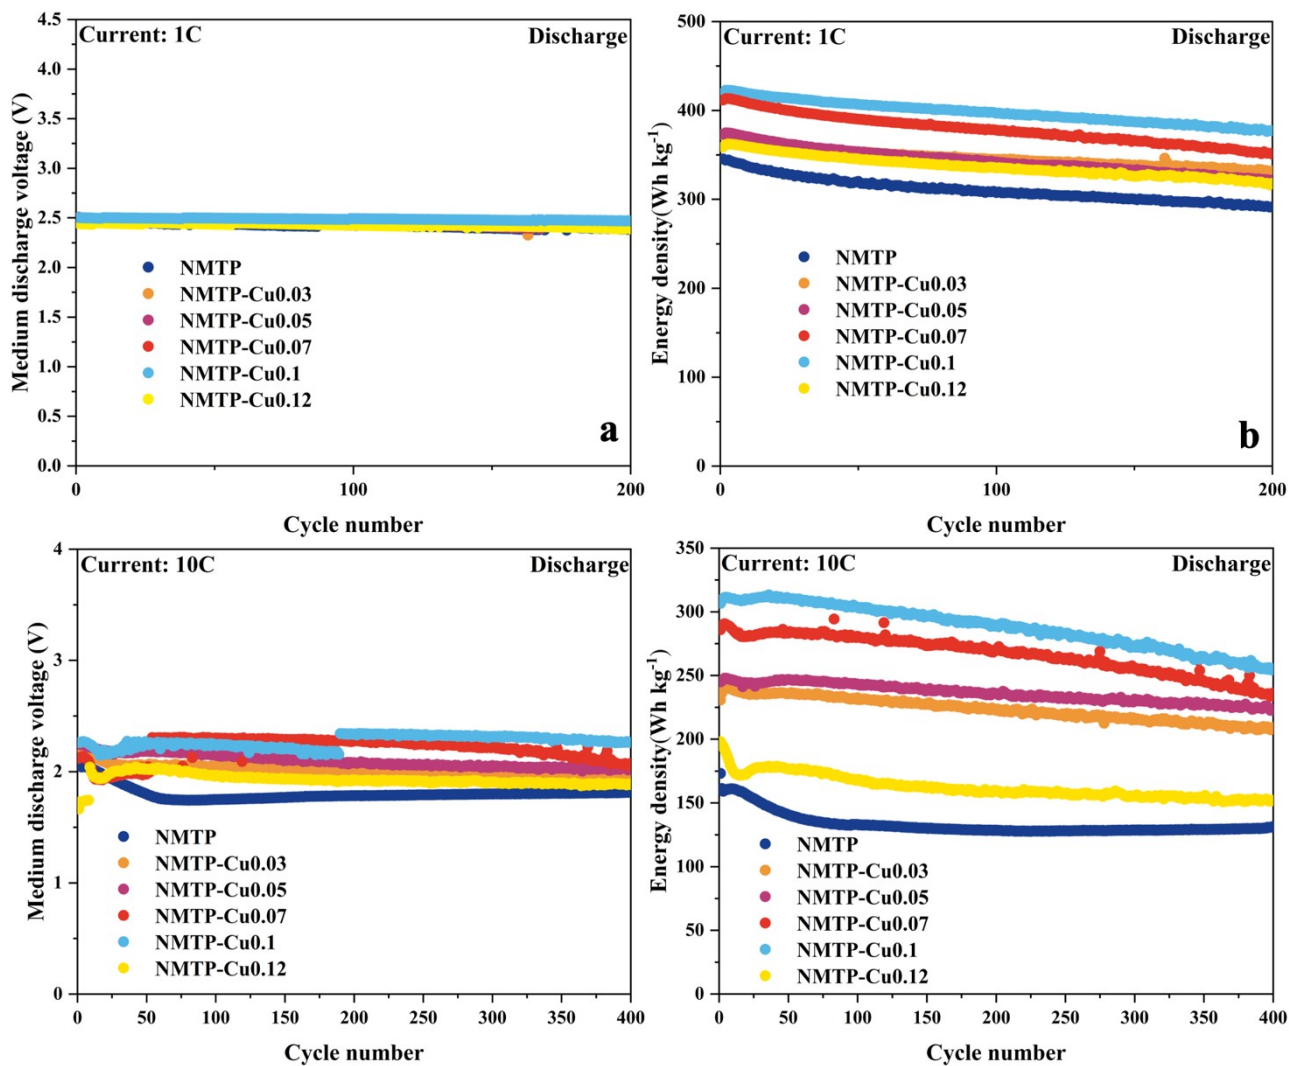

Figure S6. Medium voltage and energy density of NMTP-Cu<sub>x</sub> (x=0.03, 0.05, 0.07, 0.12) series.

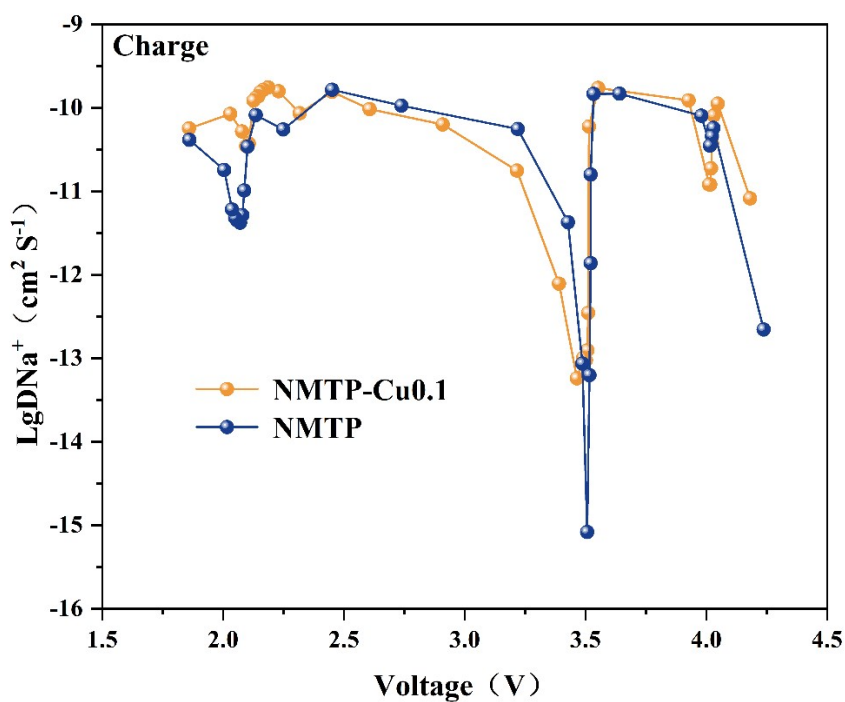

Figure S7. Plots of the  $\log \left( \text{Na}^+ \right)$  versus cell potential profiles for NMTP-Cu<sub>0.1</sub> and NMTP during charge process at 0.1C.

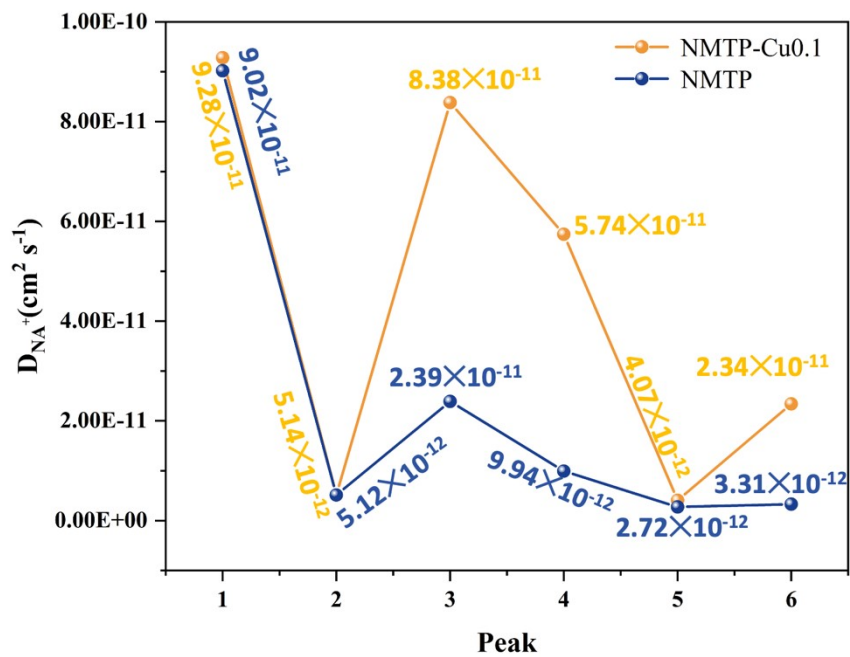

Figure S8. Calculation of Na<sup>+</sup> diffusion coefficients by CV.

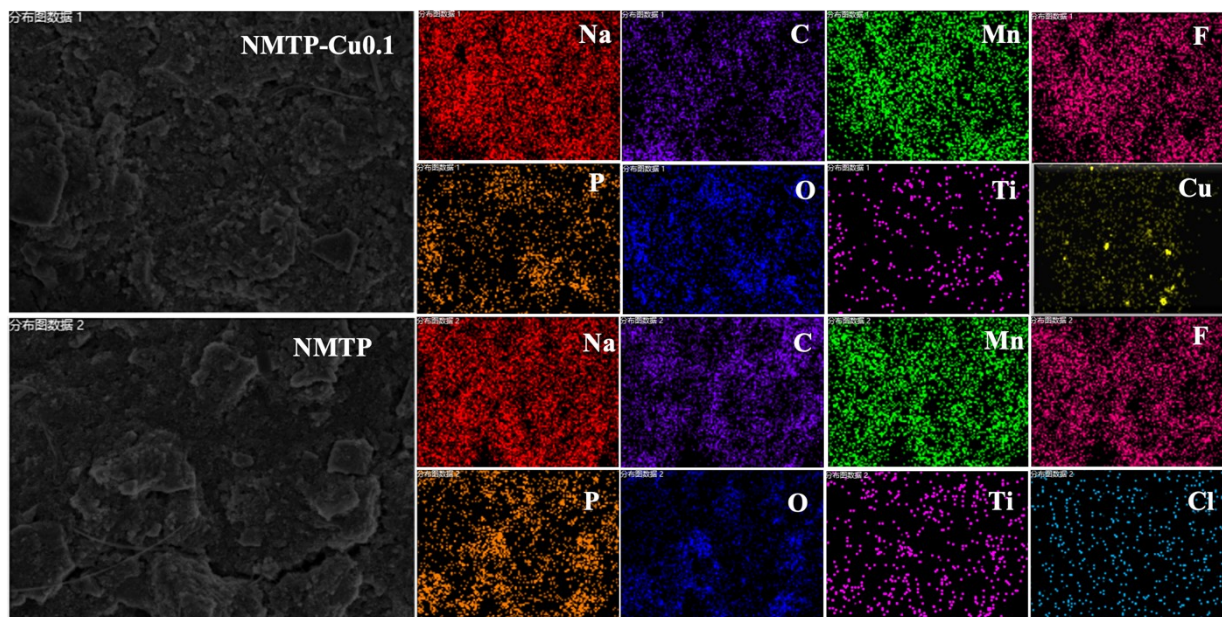

Figure S9. EDS mapping images and SEM images of NMTP-Cu<sub>0.1</sub> and NMTP after 3000 cycles.

**Table S1.** Stoichiometry of compounds determined by ICP-OES.

| Copper ion<br>doping content | Measured atomic ratio/wt% |       |       |       |       | Chemical formula                                                                                            |
|------------------------------|---------------------------|-------|-------|-------|-------|-------------------------------------------------------------------------------------------------------------|
|                              | Na                        | Mn    | Cu    | Ti    | P     |                                                                                                             |
| 0                            | 2.097                     | 1.070 | /     | 1.011 | 2.650 | Na <sub>2.10</sub> Mn <sub>1.07</sub> Ti <sub>1.01</sub> (PO <sub>4</sub> ) <sub>3</sub>                    |
| 0.03                         | 2.635                     | 0.996 | 0.030 | 1.014 | 2.541 | Na <sub>2.64</sub> Mn <sub>0.99</sub> Cu <sub>0.03</sub> Ti <sub>1.01</sub> (PO <sub>4</sub> ) <sub>3</sub> |
| 0.05                         | 2.643                     | 0.992 | 0.050 | 1.017 | 2.593 | Na <sub>2.65</sub> Mn <sub>0.99</sub> Cu <sub>0.05</sub> Ti <sub>1.01</sub> (PO <sub>4</sub> ) <sub>3</sub> |
| 0.07                         | 2.673                     | 0.960 | 0.070 | 1.019 | 2.520 | Na <sub>2.68</sub> Mn <sub>0.96</sub> Cu <sub>0.07</sub> Ti <sub>1.01</sub> (PO <sub>4</sub> ) <sub>3</sub> |
| 0.10                         | 2.733                     | 0.940 | 0.090 | 1.019 | 2.543 | Na <sub>2.74</sub> Mn <sub>0.94</sub> Cu <sub>0.10</sub> Ti <sub>1.01</sub> (PO <sub>4</sub> ) <sub>3</sub> |
| 0.12                         | 2.679                     | 0.917 | 0.120 | 1.012 | 2.567 | Na <sub>2.68</sub> Mn <sub>0.92</sub> Cu <sub>0.12</sub> Ti <sub>1.01</sub> (PO <sub>4</sub> ) <sub>3</sub> |

**Table S2.** The structure information details of NMTP derived from Rietveld Refinement.

| Space group = R-3c      |         |         | Rp = 5.02%               |              | Rwp = 6.37%                    |         |
|-------------------------|---------|---------|--------------------------|--------------|--------------------------------|---------|
| a (Å) = b (Å) = 8.84123 |         |         | c(Å) = 21.62726          |              | $\alpha(^{\circ}) = 90$        |         |
| $\beta(^{\circ}) = 90$  |         |         | $\gamma(^{\circ}) = 120$ |              | V (Å <sup>3</sup> ) = 1464.056 |         |
| Atom                    | X       | Y       | Z                        | Wyckoff site | Occupancy                      | Uiso    |
| Na1                     | 0.00000 | 0.00000 | 0.00000                  | 6b           | 0.705                          | 0.02225 |
| Na2                     | 0.64224 | 0.00000 | 0.25000                  | 18e          | 0.767                          | 0.01372 |
| Mn                      | 0.00000 | 0.00000 | 0.14918                  | 12c          | 0.492                          | 0.00535 |
| Ti                      | 0.00000 | 0.00000 | 0.14918                  | 12c          | 0.508                          | 0.00535 |
| P                       | 0.29838 | 0.00000 | 0.25000                  | 18e          | 1.000                          | 0.00679 |
| O1                      | 0.01360 | 0.20900 | 0.19320                  | 36f          | 1.000                          | 0.00283 |
| O2                      | 0.18630 | 0.17210 | 0.08520                  | 36f          | 1.000                          | 0.00450 |

**Table S3.** The structure information details of NMTP-Cu<sub>0.1</sub> derived from Rietveld Refinement.

| Space group = R-3c      |         |         | Rp = 5.81%               |              | Rwp = 7.31%                    |         |
|-------------------------|---------|---------|--------------------------|--------------|--------------------------------|---------|
| a (Å) = b (Å) = 8.83327 |         |         | c(Å) = 21.61683          |              | $\alpha(^{\circ}) = 90$        |         |
| $\beta(^{\circ}) = 90$  |         |         | $\gamma(^{\circ}) = 120$ |              | V (Å <sup>3</sup> ) = 1460.715 |         |
| Atom                    | X       | Y       | Z                        | Wyckoff site | Occupancy                      | Uiso    |
| Na1                     | 0.00000 | 0.00000 | 0.00000                  | 6b           | 0.664                          | 0.02200 |
| Na2                     | 0.64250 | 0.00000 | 0.25000                  | 18e          | 0.720                          | 0.01399 |
| Mn                      | 0.00000 | 0.00000 | 0.14920                  | 12c          | 0.457                          | 0.00568 |
| Ti                      | 0.00000 | 0.00000 | 0.14920                  | 12c          | 0.495                          | 0.00568 |
| Cu                      | 0.00000 | 0.00000 | 0.14920                  | 12c          | 0.048                          | 0.00568 |
| P                       | 0.29838 | 0.00000 | 0.25000                  | 18e          | 1.000                          | 0.00728 |

|    |         |         |         |     |       |         |
|----|---------|---------|---------|-----|-------|---------|
| O1 | 0.01360 | 0.20900 | 0.19320 | 36f | 1.000 | 0.00311 |
| O2 | 0.18630 | 0.17210 | 0.08520 | 36f | 1.000 | 0.00489 |

**Table S4.** Comparison between NMTP-Cu<sub>0.1</sub> and other reported NMTP cathodes for SIBs.

| Materials                                                                                                | Low-rate capacity    | High-rate capacity | Capacity stability            |
|----------------------------------------------------------------------------------------------------------|----------------------|--------------------|-------------------------------|
| NMTP/C <sub>-650</sub> <sup>[1]</sup>                                                                    | 160mAh/g at 0.2C     | 129mAh/g at 2C     | 92% after 500 cycles at 2C    |
| 10%Cr-NMTP <sup>[2]</sup>                                                                                | 126.72mAh/g at 0.1C  | 85.99mAh/g at 5C   | 73.74% after 500cycles at 10C |
| NMTP-V <sub>3</sub> <sup>[3]</sup>                                                                       | 133.6mAh/g at 0.1C   | 69.1mAh/g at 10C   | 73.6% after 500cycles at 1C   |
| Na <sub>3</sub> MnTi(PO <sub>4</sub> ) <sub>3</sub> -CNF <sup>[4]</sup>                                  | 124.38mAh/g at 0.05C | 77.6mAh/g at 20C   | 59.6% after 1000 cycles at 1C |
| Na <sub>3</sub> MnTi(PO <sub>4</sub> ) <sub>3</sub> WC <sup>[5]</sup>                                    | 123.0mAh/g at 0.1C   | 73.0mAh/g at 2C    | 92% after 1000 cycles at 2C   |
| Na <sub>3.5</sub> MnTi <sub>0.93</sub> Co <sub>0.07</sub> (PO <sub>4</sub> ) <sub>3</sub> <sup>[6]</sup> | 150.5mAh/g at 0.1C   | 112.0mAh/g at 10C  | 94.7% after 100 cycles at 1C  |
| Na <sub>3.4</sub> Mn <sub>1.2</sub> Ti <sub>0.8</sub> (PO <sub>4</sub> ) <sub>3</sub> <sup>[7]</sup>     | 141.9mAh/g at 0.1C   | 96.59mAh/g at 2C   | 97.1% after 500 cycles at 2C  |
| NMTP-Fe <sub>0.02</sub> <sup>[8]</sup>                                                                   | 153.2mAh/g at 0.1C   | 139.5mAh/g at 5C   | 81.5% after 800 cycles at 5C  |
| This Work                                                                                                | 167.25mAh/g at 0.1C  | 120.85mAh/g at 10C | 86.7% after 400 cycles at 10C |

**Table S5.** Discharge specific capacity of NMTP-Cu<sub>x</sub> (x=0, 0.03, 0.05, 0.07, 0.1, 0.12) series at different rates.

| Samples (mAh/g) | 0.1C   | 0.2C   | 0.5C   | 1C     | 2C     | 5C     | 10C    | 0.1C   |
|-----------------|--------|--------|--------|--------|--------|--------|--------|--------|
| NMTP            | 151.60 | 139.13 | 129.40 | 122.37 | 114.52 | 100.74 | 82.60  | 139.82 |
| NMTP-Cu0.03     | 158.06 | 147.17 | 138.65 | 131.81 | 124.04 | 110.22 | 93.53  | 148.66 |
| NMTP-Cu0.05     | 160.52 | 145.76 | 136.32 | 129.16 | 121.22 | 107.05 | 88.53  | 148.29 |
| NMTP-Cu0.07     | 164.11 | 151.30 | 142.06 | 135.77 | 128.55 | 115.07 | 95.19  | 153.74 |
| NMTP-Cu0.1      | 167.25 | 158.12 | 150.36 | 144.83 | 139.12 | 126.87 | 101.36 | 159.63 |
| NMTP-Cu0.12     | 156.44 | 143.31 | 133.71 | 126.03 | 118.07 | 102.87 | 71.52  | 145.74 |

**Table S6.** Discharge energy density of NMTP-Cu<sub>x</sub> (x=0, 0.03, 0.05, 0.07, 0.1, 0.12) series at ranging current density.

| Samples (Wh/kg) | Energy density at 0.1C | Energy density at 1C | Energy density at 10C |
|-----------------|------------------------|----------------------|-----------------------|
| NMTP            | 443.44                 | 345.49               | 173.14                |
| NMTP-Cu0.03     | 459.56                 | 372.49               | 230.75                |
| NMTP-Cu0.05     | 456.23                 | 373.31               | 245.01                |
| NMTP-Cu0.07     | 474.19                 | 411.69               | 285.89                |
| NMTP-Cu0.1      | 481.89                 | 419.51               | 306.57                |
| NMTP-Cu0.12     | 432.74                 | 358.85               | 198.01                |

**Table S7.** Discharge specific capacity of N NMTP-Cu<sub>x</sub> (x=0, 0.03, 0.05, 0.07, 0.1, 0.12) series at 1C after 200 cycles.

| Samples     | First cycle discharge specific capacity/(mAh/g) | Capacity retention(%) | columbic efficiency (%) |
|-------------|-------------------------------------------------|-----------------------|-------------------------|
| NMTP        | 127.26                                          | 88.78                 | 99.68                   |
| NMTP-Cu0.03 | 136.98                                          | 91.25                 | 99.21                   |
| NMTP-Cu0.05 | 137.34                                          | 89.08                 | 99.69                   |
| NMTP-Cu0.07 | 149.56                                          | 88.32                 | 99.67                   |
| NMTP-Cu0.1  | 152.39                                          | 91.54                 | 99.66                   |
| NMTP-Cu0.12 | 134.28                                          | 90.17                 | 99.64                   |

**Table S8.** Discharge specific capacity of NMTP-Cu<sub>x</sub> (x=0, 0.03, 0.05, 0.07, 0.1, 0.12) series at 10C after 400 cycle.

| Samples     | First cycle discharge specific capacity (mAh/g) | Capacity retention(%) | columbic efficiency (%) |
|-------------|-------------------------------------------------|-----------------------|-------------------------|
| NMTP        | 76.97                                           | 82.98                 | 99.89                   |
| NMTP-Cu0.03 | 97.55                                           | 93.43                 | 99.89                   |
| NMTP-Cu0.05 | 100.11                                          | 95.04                 | 99.88                   |
| NMTP-Cu0.07 | 116.15                                          | 86.20                 | 99.78                   |
| NMTP-Cu0.1  | 120.85                                          | 86.74                 | 99.84                   |
| NMTP-Cu0.12 | 89.64                                           | 79.77                 | 99.88                   |

**Table S9.** Dynamic parameters of NMTP-Cu<sub>x</sub> (x=0, 0.03, 0.05, 0.07, 0.1, 0.12) series obtained via equivalent circuit fitting.

| Samples     | R <sub>s</sub> (Ω) | R <sub>f</sub> (Ω) | R <sub>ct</sub> (Ω) | σ(Ω cm <sup>2</sup> s <sup>-1/2</sup> ) | D <sub>Na+</sub> (cm <sup>2</sup> s <sup>-1</sup> ) |
|-------------|--------------------|--------------------|---------------------|-----------------------------------------|-----------------------------------------------------|
| NMTP        | 4.809              | 16.350             | 230.700             | 151.900                                 | 2.998×10 <sup>-13</sup>                             |
| NMTP-Cu0.03 | 5.114              | 10.860             | 115.600             | 107.300                                 | 4.004×10 <sup>-13</sup>                             |
| NMTP-Cu0.05 | 5.773              | 11.290             | 128.100             | 112.000                                 | 3.675×10 <sup>-13</sup>                             |
| NMTP-Cu0.07 | 4.919              | 10.170             | 99.970              | 105.800                                 | 4.118×10 <sup>-13</sup>                             |
| NMTP-Cu0.1  | 5.045              | 8.585              | 95.610              | 73.700                                  | 8.487×10 <sup>-13</sup>                             |
| NMTP-Cu0.12 | 4.646              | 7.353              | 153.000             | 71.900                                  | 7.917×10 <sup>-13</sup>                             |

**Table S10.** Comparison of Na<sup>+</sup> diffusion coefficients derived from GITT, CV and EIS methods.

| Method | NMTP                                          | NMTP-Cu <sub>0.1</sub>                        | Trend | Notes                                                       |
|--------|-----------------------------------------------|-----------------------------------------------|-------|-------------------------------------------------------------|
| GITT   | 6.41×10 <sup>-11</sup> (average)              | 7.54×10 <sup>-11</sup> (average)              | ↑     | Apparent diffusivity; Including phase boundary contribution |
| CV     | 10 <sup>-11</sup> ~ 10 <sup>-12</sup> (range) | 10 <sup>-11</sup> ~ 10 <sup>-12</sup> (range) | ↑     | Pear-dependent; Consistent with GITT order magnitude        |

## References

- [1] T. Zhu, P. Hu, X. Wang, Z. Liu, W. Luo, K. A. Owusu, W. Cao, C. Shi, J. Li, L. Zhou, L. Mai. Realizing three-electron redox reactions in NASICON-structured  $\text{Na}_3\text{MnTi}(\text{PO}_4)_3$  for sodium-ion batteries. 2019, 9, 1803436
- [2] Y. Jiang, Y. Wang, X. Li, J. Zhang, K. Chen, J. Liang, L. Zhao, C. Dai. a Chromium doped NASICON-structured  $\text{Na}_3\text{MnTi}(\text{PO}_4)_3/\text{C}$  cathode for high-performance sodium-ion batteries. *Colloids and Surfaces A: Physicochemical and Engineering Aspects*. 2022, 649, 129340.
- [3] Y. Jiang, J.n Liang, K. Song, K. Chen, X. Li, L. Zhao, C. Dai, J. Zhang, Y. Wang. Benefits of vanadium doping in  $\text{Na}_3\text{MnTi}(\text{PO}_4)_3/\text{C}$  as a potential candidate for sodium-ion batteries. *Materials Chemistry and Physics*. 2022, 282, 125938.
- [4] D. M. Conti, C. Urru, G. Bruni, P. Galinetto, B. Albini, V. Berbenni, A. Girella, D. Capsoni.  $\text{Na}_3\text{MnTi}(\text{PO}_4)_3/\text{C}$  Nanofiber Free-Standing Electrode for Long-Cycling-Life Sodium-Ion Batteries. *Nanomaterials*. 2024, 14, 804.
- [5] F. Xia, M. Ahangari, J. Wu, D. H. Tran, X. Zhou, Z. Chen, H. Luo, M. Zhou. Reductive Carbon as an Additive Enables the High Capacity and Durability of NASICON Structured Sodium-Ion Batteries. 2025, 8, 4355.
- [6] N. Chen, X. Qin, Z. Guo, A. Li, Y. Zhang, T. Yang, A. Feng, Y. Qin. Co doping in NASICON-structured  $\text{Na}_{3.5}\text{MnTi}(\text{PO}_4)_3$  enables superior structural stabilization and rate performance. *Journal of Alloys and Compounds*. 2024, 1005, 176130.
- [7] C. Li, S. Pu, J. Liu, Y. Huang, J. Chen, X. Xiang, L. Fu, C. Zou, X. Li, M. Wang, Y. Lin, H. Cao. Enhancing Kinetics in Sodium Super Ion Conductor  $\text{Na}_3\text{MnTi}(\text{PO}_4)_3$  through Microbe-Assisted and Structural Optimization. 2024, 16, 17, 22035.
- [8] M. Yang, S. Deng, S. Cheng, J. Zhao, S. Li, Y. Bai. Unlocking fast and reversible sodium intercalation in  $\text{Na}_3\text{MnTi}(\text{PO}_4)_3$  cathode toward high performance sodium-ion batteries. *Nano Research*. 2025, 18, 94907561.
